# Supplementary material for: Heat shock cognate 70 protein is a novel target of nobiletin and its colonic metabolites in inhibiting colon carcinogenesis
Source: Royal Society of Chemistry journal article supplement (doi:10.1039/d4fo03211j), 2024-01-01
Supplement: d4fo03211j1.pdf [file d4fo03211j1.pdf]

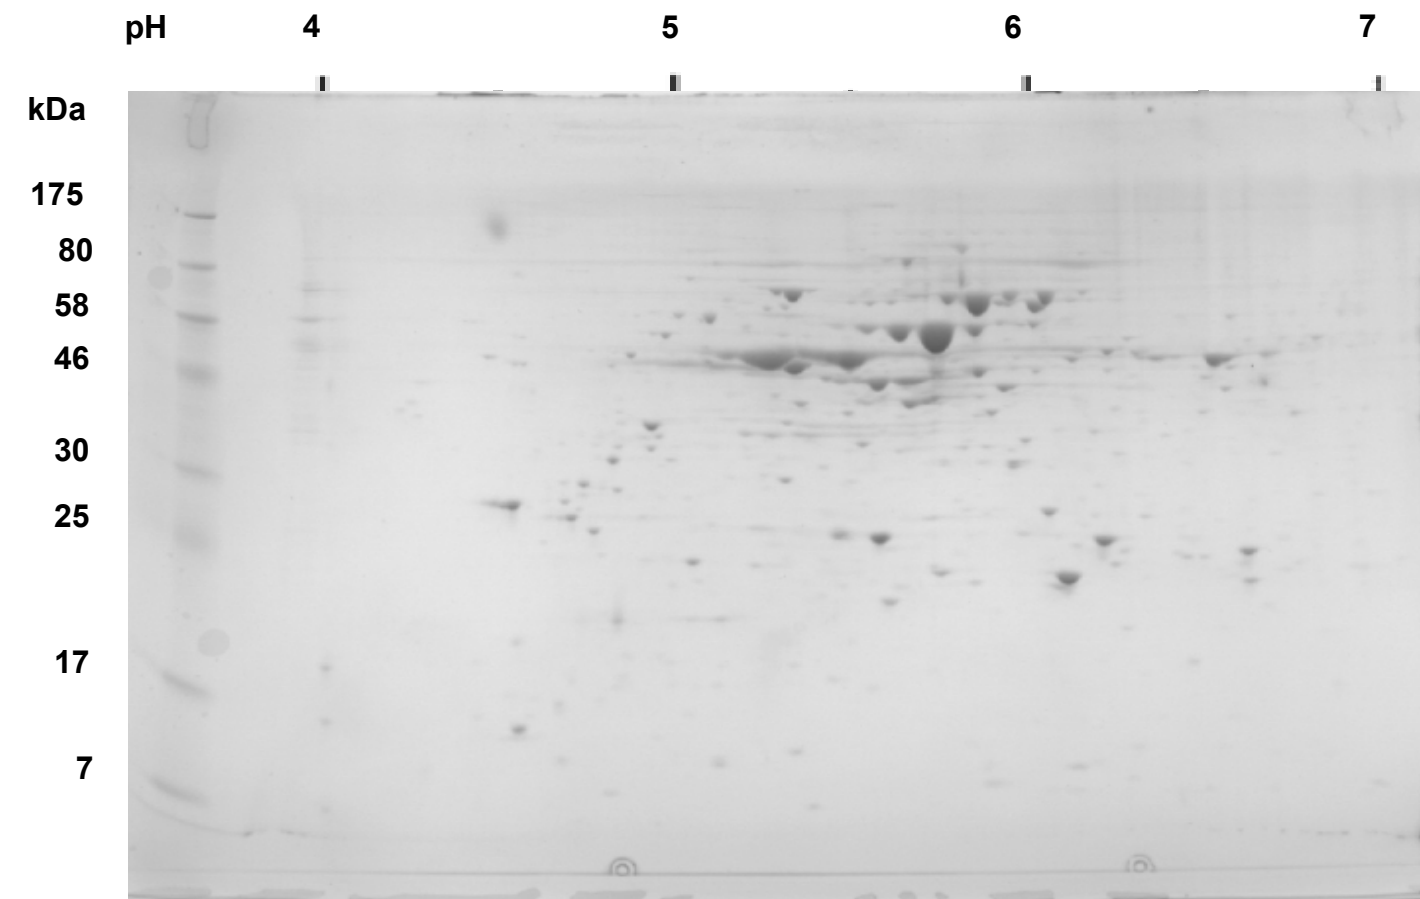

**Supplementary Figure 1. Original SDS-PAGE.** 2D gel SDS-PAGE stained with Coomassie Brilliant Blue G-250 of Nobiletin binding proteins from HCT-116 cells.

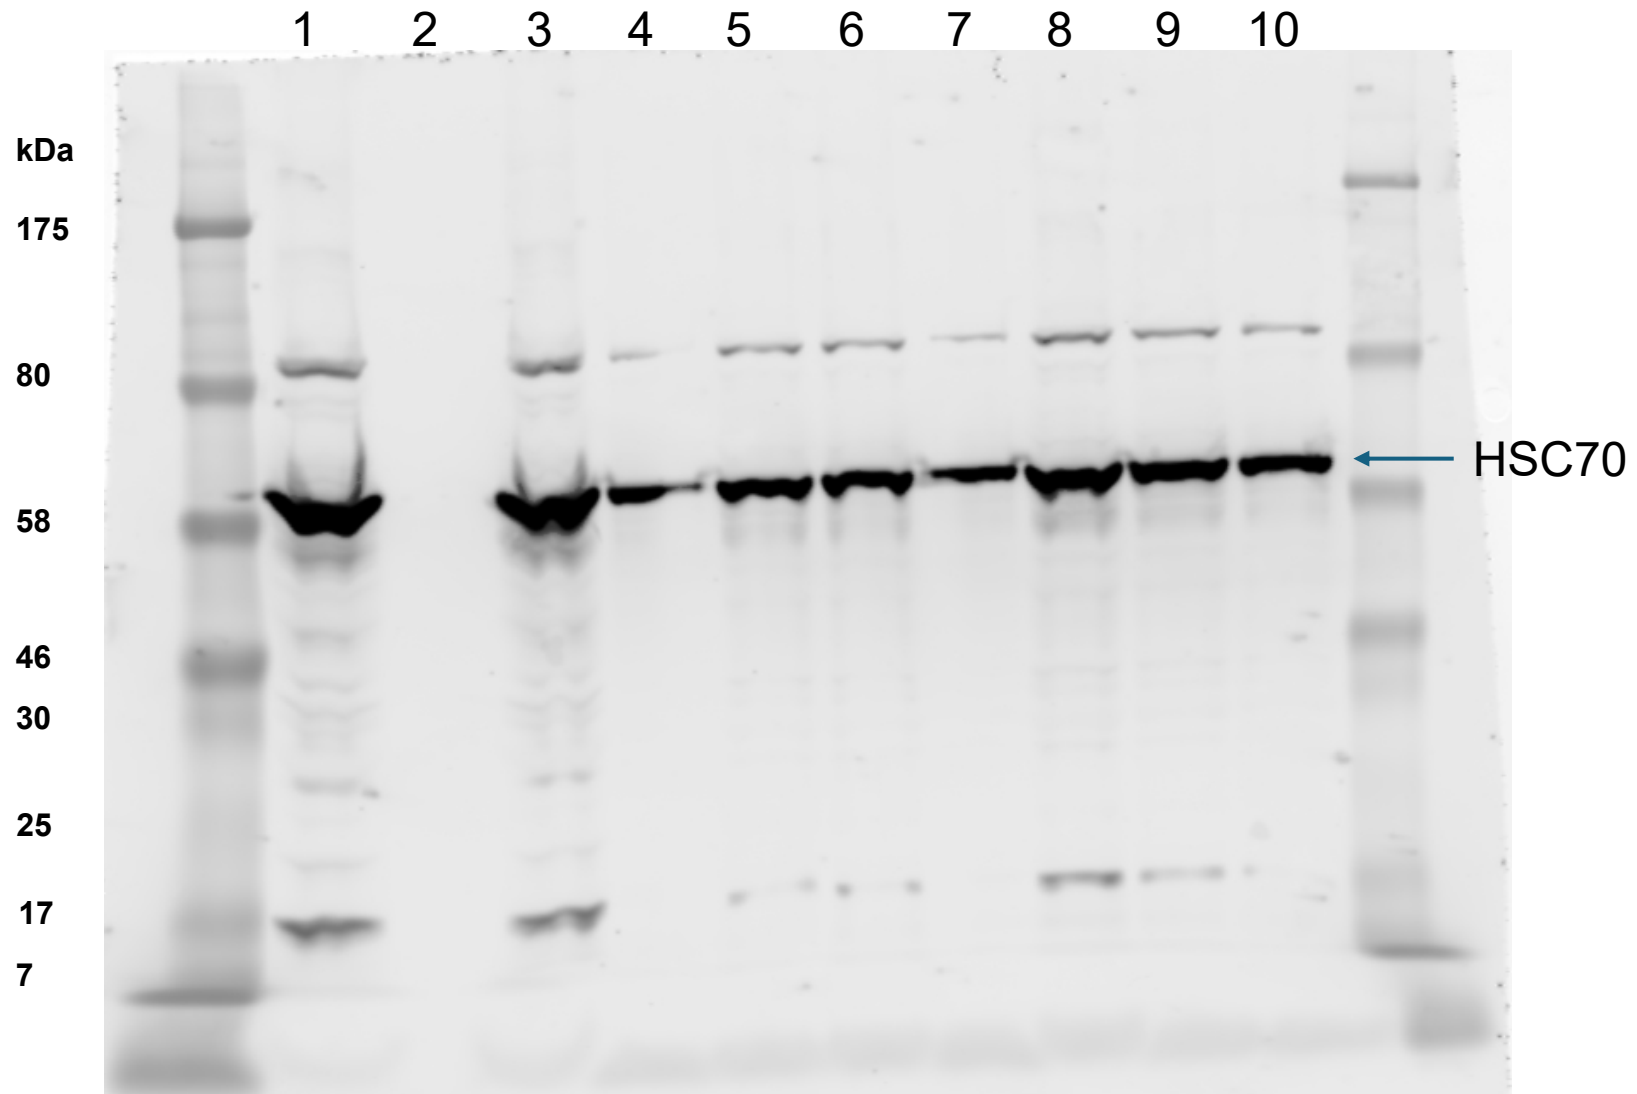

**Supplementary Figure 2. Original western blotting.** 600 μg cell lysates were incubated with NBT-Sepharose for 45 min at 4 °C, DMSO (lane 3), 50 μM NBT (lane 4), 50 μM M1 (lane 5), 50 μM M2 (lane 6), 50 μM M3 (lane 7), and 100, 300, 500 μM ATP (lane 8-10) were added into NBT-Sepharose affinity columns respectively, bound proteins were eluted and precipitated followed by western blot analysis using a HSC70 antibody. Lane 1, input control, lane 2, control-Sepharose.

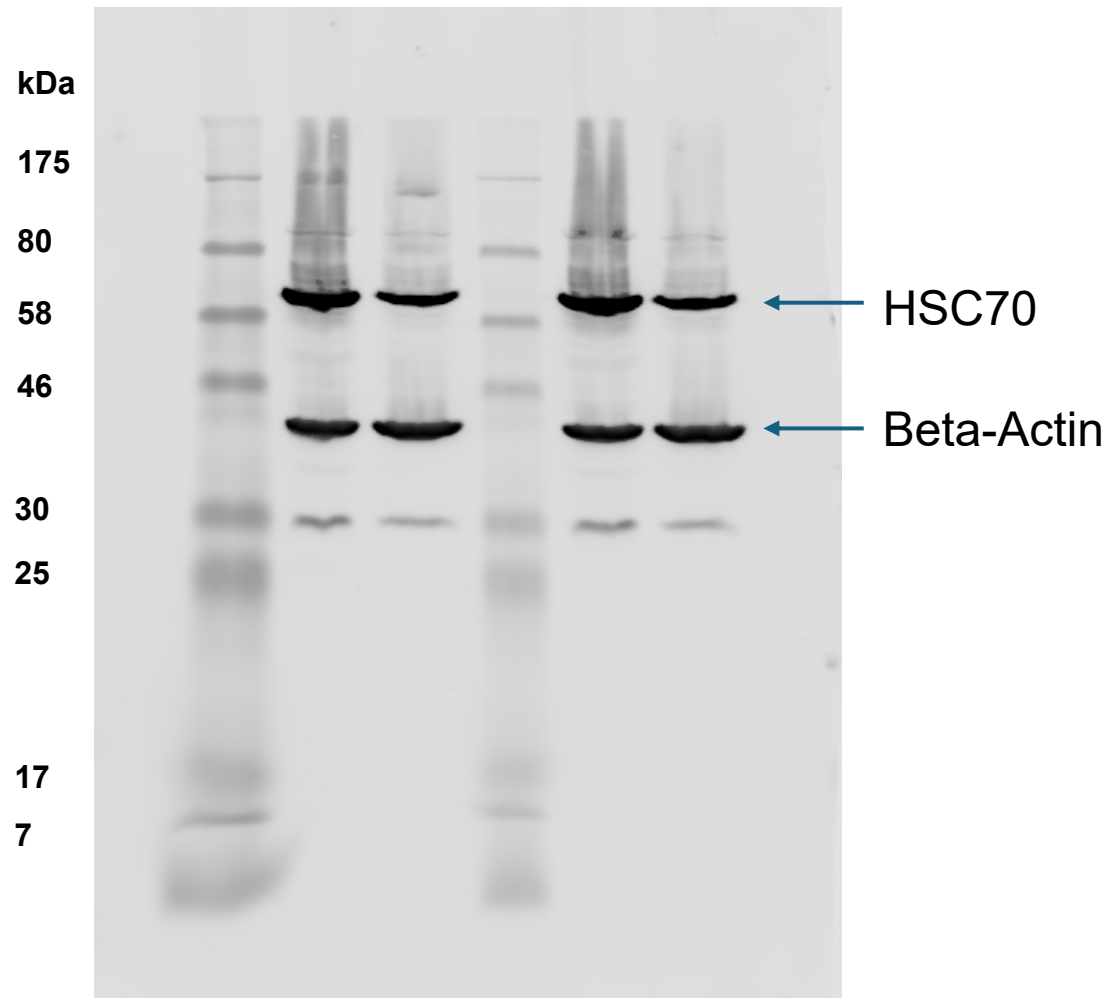

**Supplementary Figure 3. Original western blotting. HSC70 knock down by siRNA**
